# Supplementary material for: ASS1 and ASL suppress growth in clear cell renal cell carcinoma via altered nitrogen metabolism
Source: PubMed Central journal article supplement (PMC8642968; doi:10.1186/s40170-021-00271-8), 2021-12-03
Supplement: 40170_2021_271_MOESM3_ESM.pdf [file 40170_2021_271_MOESM3_ESM.pdf]

A.

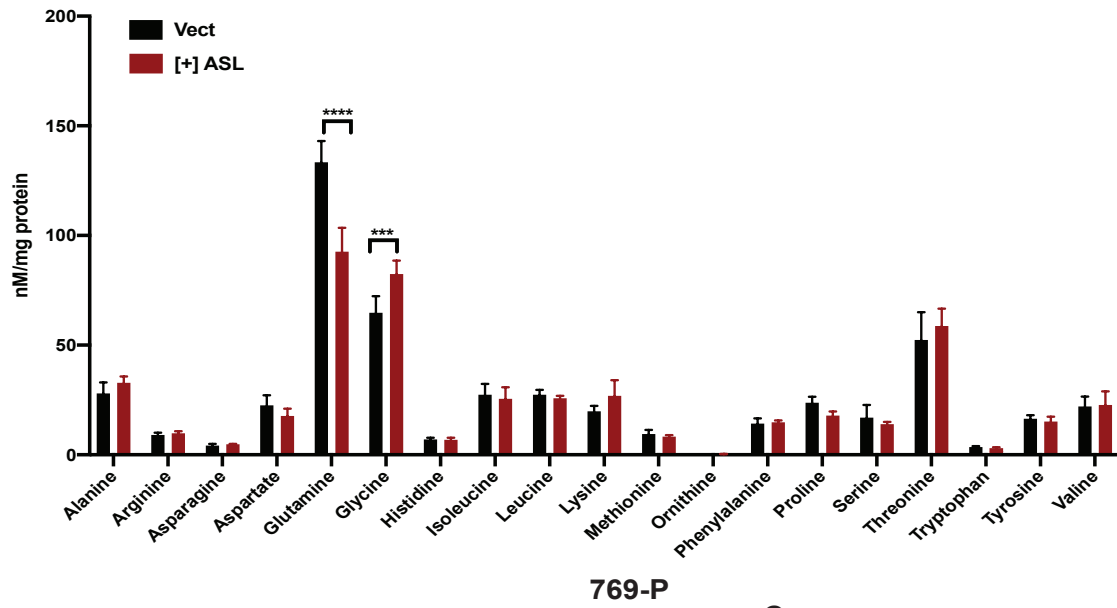

B.

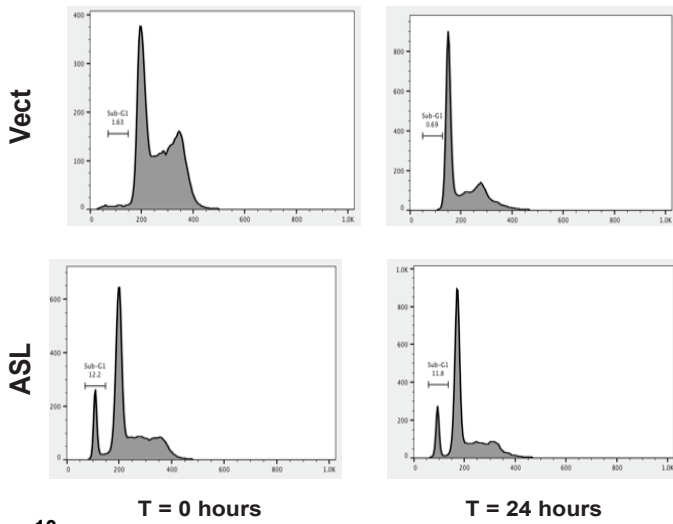

C.

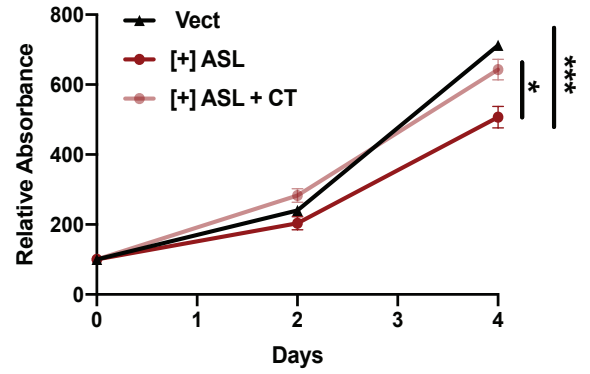

D.

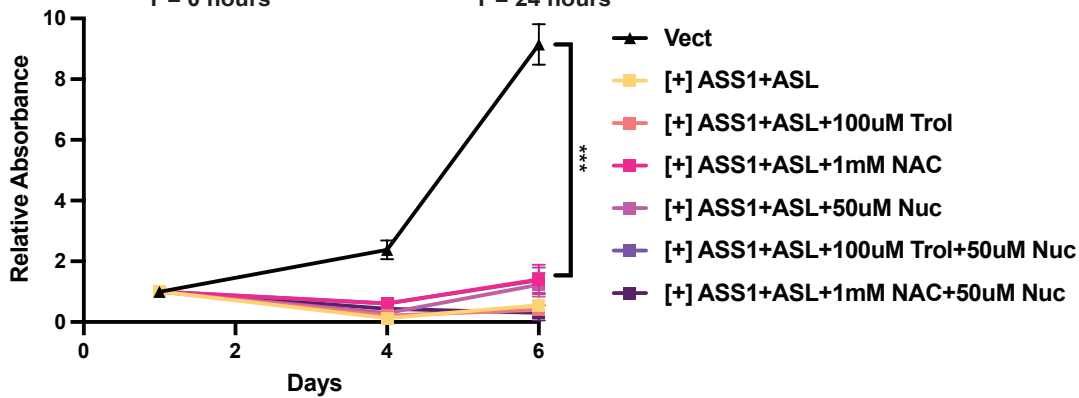

Supp. Figure 3
